# Supplementary material for: Rapid high-yield expression of a candidate influenza vaccine based on the ectodomain of M2 protein linked to flagellin in plants using viral vectors
Source: PubMed Central journal article supplement (PMC4446962; doi:10.1186/s12896-015-0164-6), 2015-05-29
Supplement: 12896_2015_164_MOESM1_ESM.pdf [file 12896_2015_164_MOESM1_ESM.pdf]

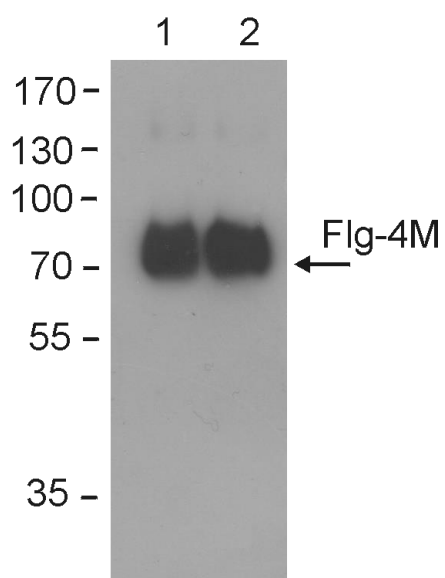

**Figure S1 Western- blot analysis of purified Flg-4M protein under reducing and non-reducing conditions.**

1, - purified Flg-4M protein analysed by SDS-PAGE under non-reducing conditions;

2, - purified Flg-4M protein analysed by SDS-PAGE under reducing conditions.

Positions of molecular weight marker (kD) are shown on the left. Antibodies against M2e were used in Western blotting.
